# Supplementary material for: Highly enhanced electrocatalytic OER activity of water-coordinated copper complexes: effect of lattice water and bridging ligand
Source: Royal Society of Chemistry journal article supplement (doi:10.1039/d3ra01186k), 2023-01-01
Supplement: d3ra01186k1.pdf [file d3ra01186k1.pdf]

**Highly enhanced electrocatalytic OER activity of water coordinated copper complexes:  
Effect of lattice water and bridging ligand**

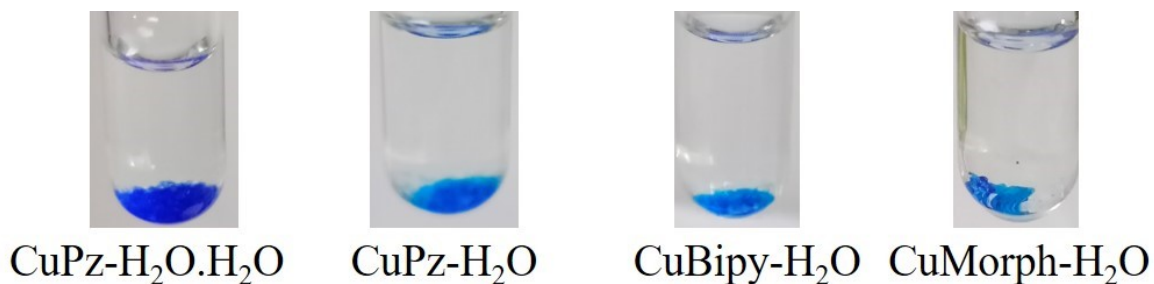

Figure S1. Digital images of copper complex crystals in ethanol.

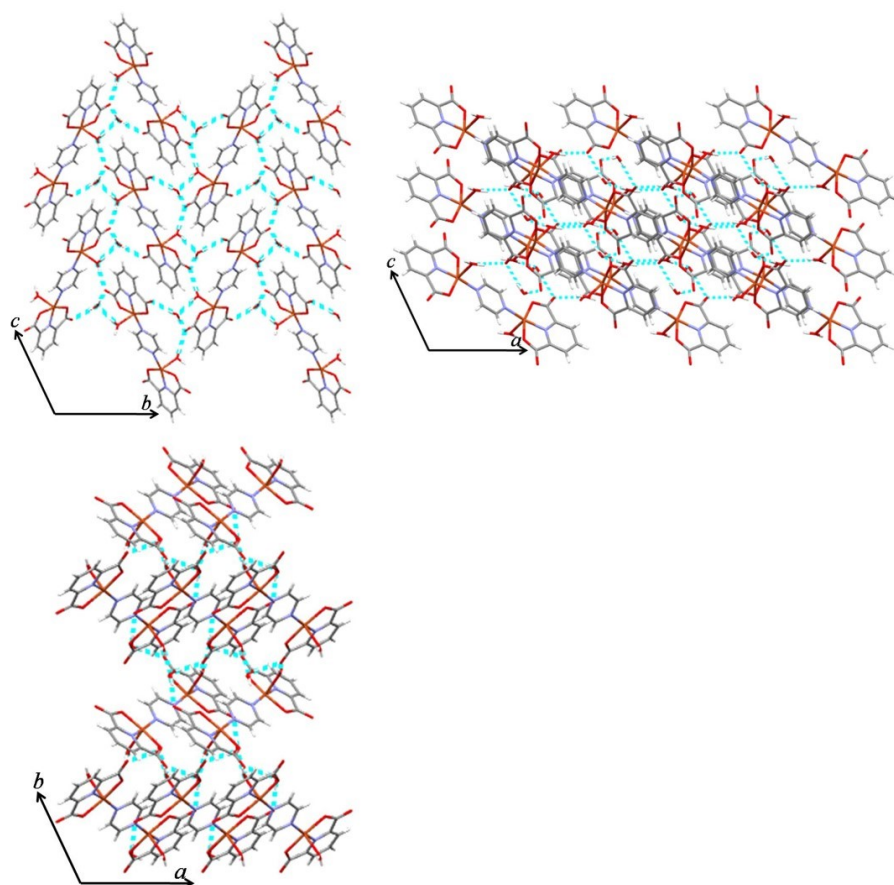

Figure S2. Molecular packing in the crystal lattice of **CuPz-H<sub>2</sub>O.H<sub>2</sub>O**. C (grey), H (white), N (blue), O (red) and Cu (brown). Dotted lines indicate the hydrogen bonding interactions. H-bond distances ranged between 2.733 and 2.980 Å.

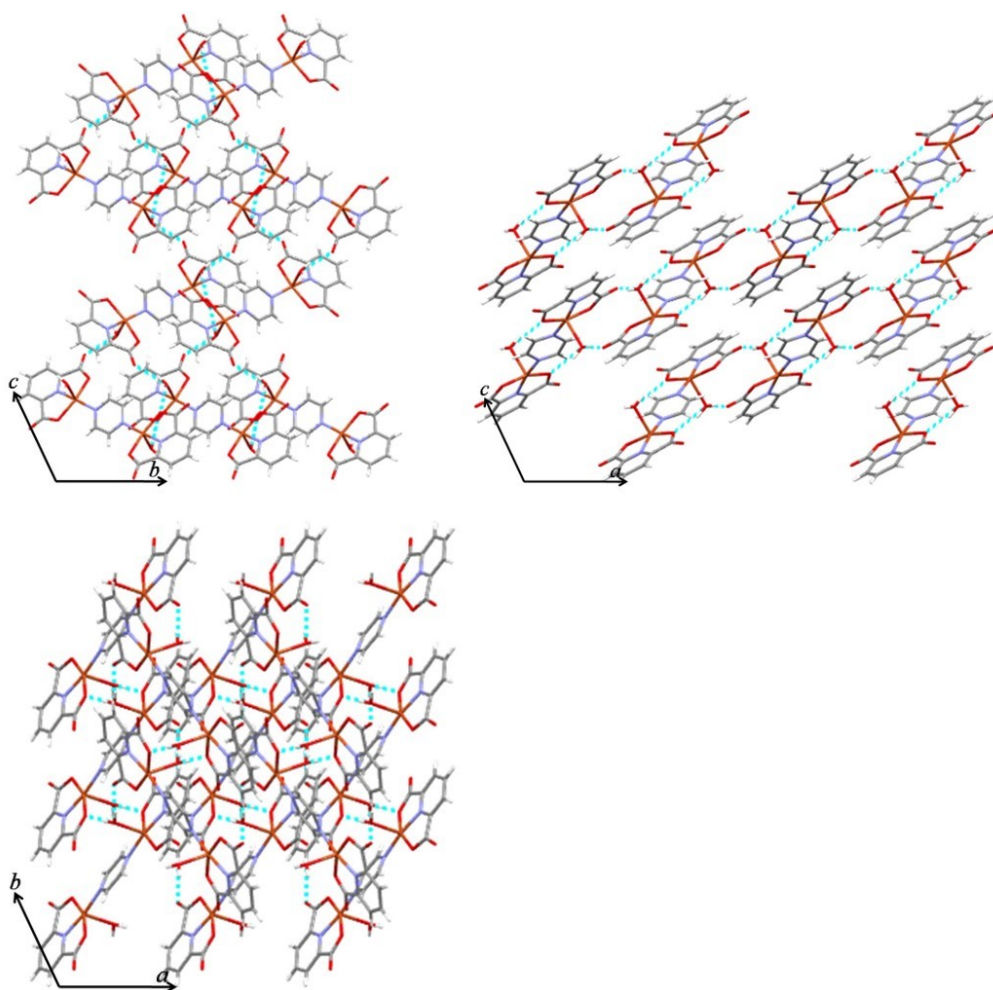

Figure S3. Molecular packing in the crystal lattice of **CuPz-H<sub>2</sub>O**. C (grey), H (white), N (blue), O (red) and Cu (brown). C (grey), H (white), N (blue), O (red) and Cu (brown). Dotted lines indicate the hydrogen bonding interactions. H-bond distances ranged between 2.733 and 2.980 Å.

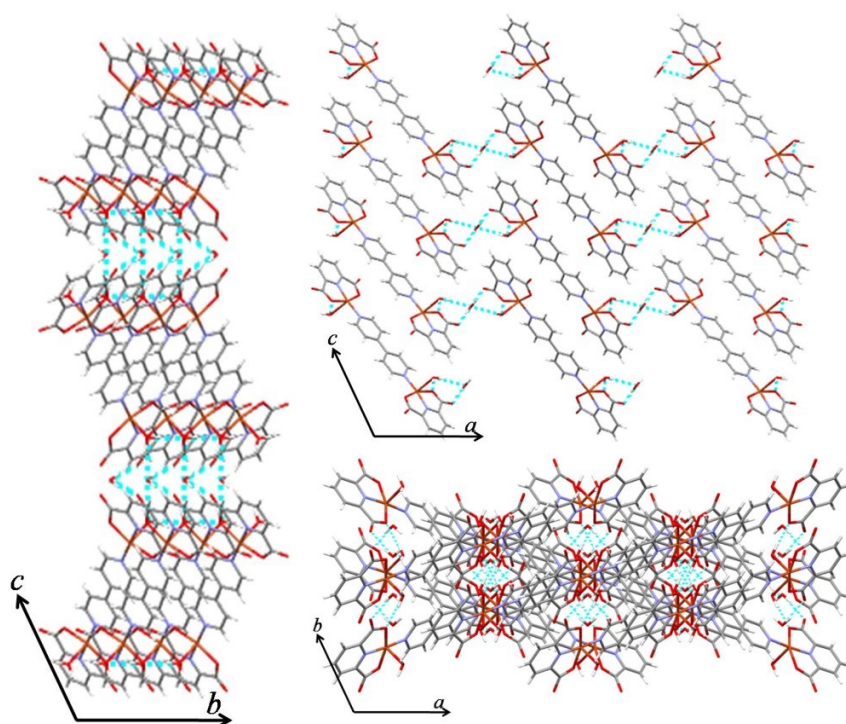

Figure S4. Molecular packing in the crystal lattice of **CuBipy-H<sub>2</sub>O.H<sub>2</sub>O**. C (grey), H (white), N (blue), O (red) and Cu (brown). C (grey), H (white), N (blue), O (red) and Cu (brown). Dotted lines indicate the hydrogen bonding interactions. H-bond distances ranged between 2.733 and 2.980 Å.

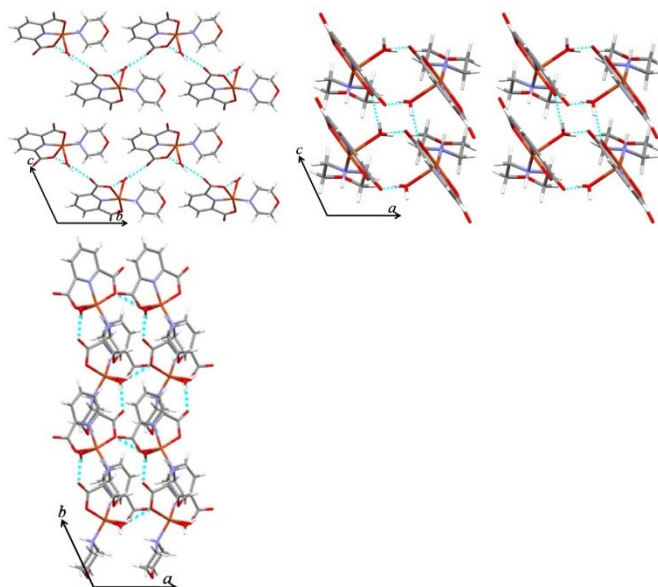

Figure S5. Molecular packing in the crystal lattice of **CuMorph-H<sub>2</sub>O**. C (grey), H (white), N (blue), O (red) and Cu (brown). C (grey), H (white), N (blue), O (red) and Cu (brown). Dotted lines indicate the hydrogen bonding interactions. H-bond distances ranged between 2.733 and 2.980 Å.

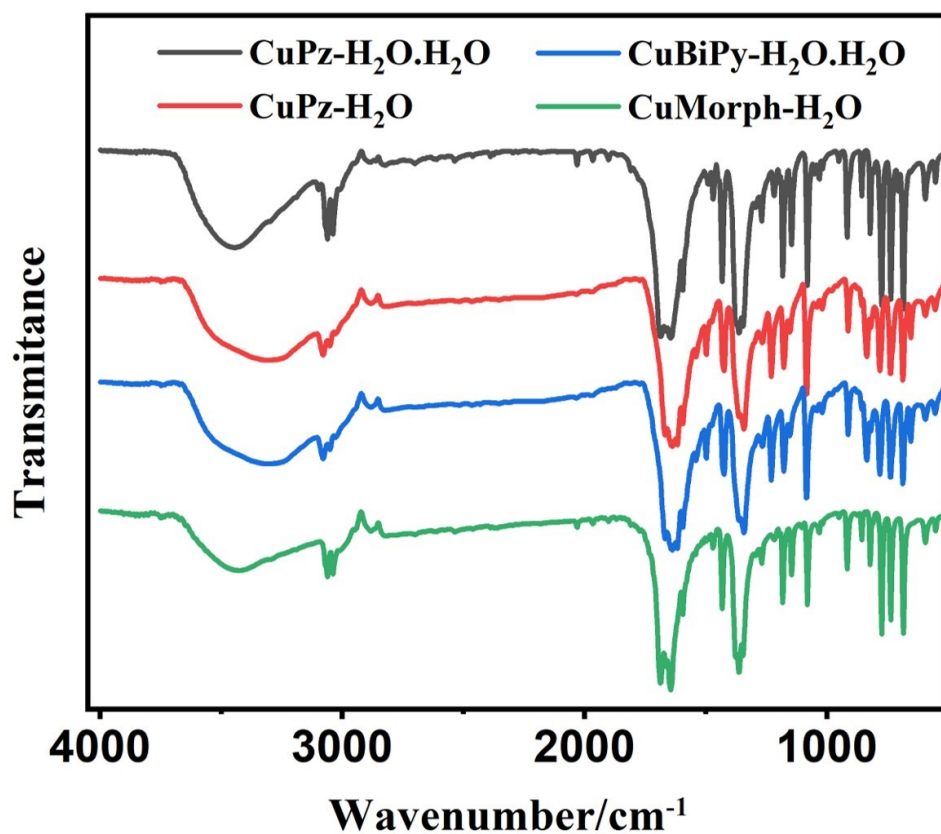

Figure S6. FTIR spectra of copper complexes.

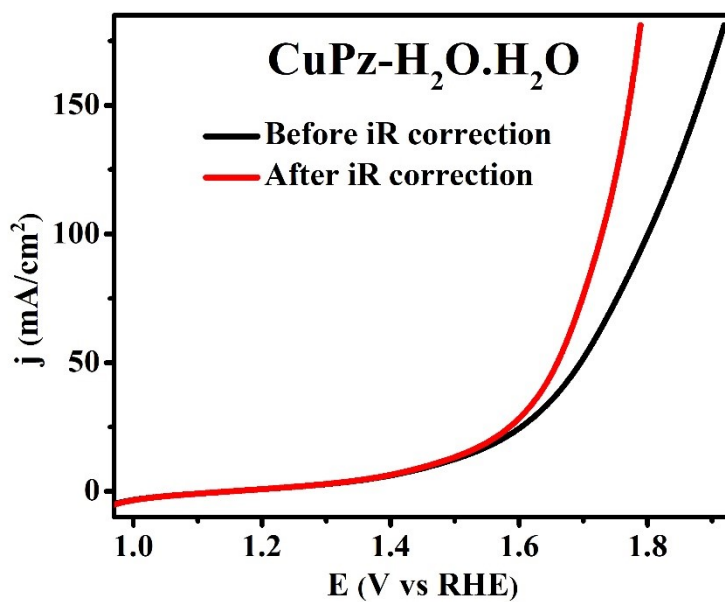

Figure S7. OER polarization curves of CuPz-H<sub>2</sub>O.H<sub>2</sub>O before and after iR correction.

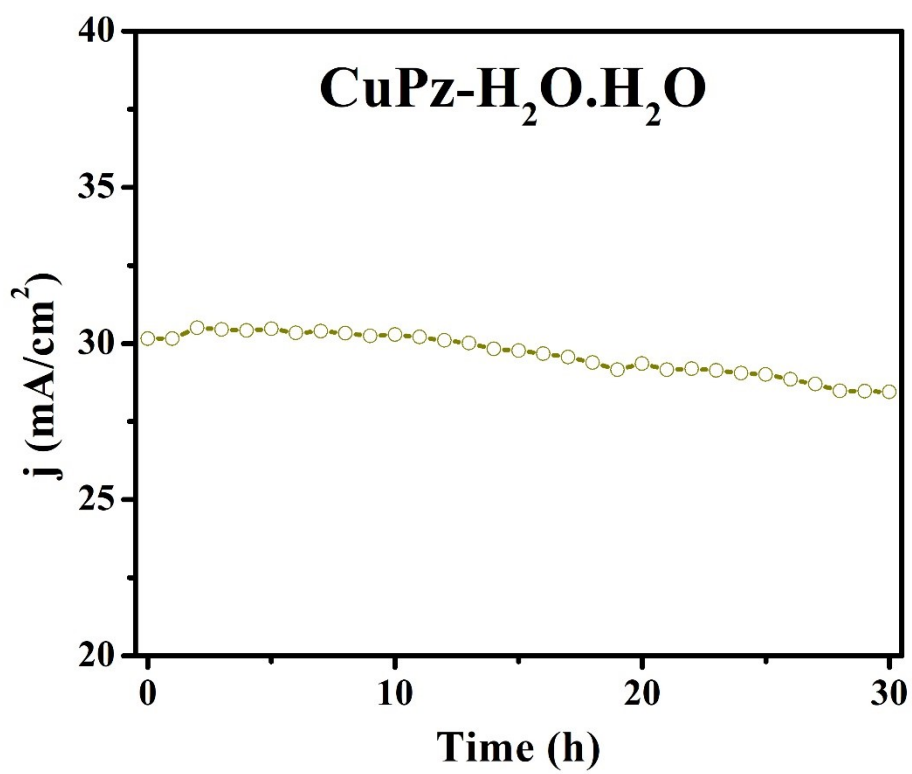

Figure S8. The current-time amperometric test performed at 30 mA/cm<sup>2</sup>.

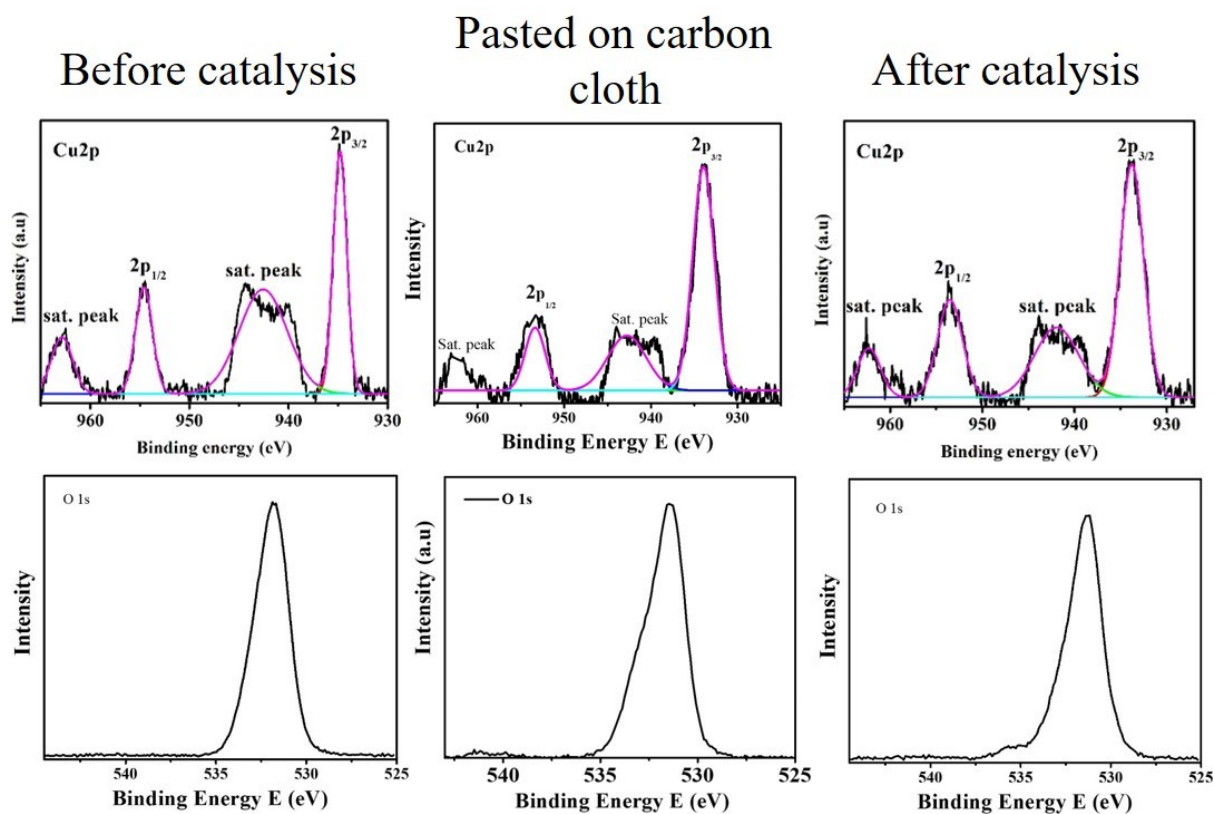

Figure S9. High resolution XPS spectra of Cu 2p and O 1s of  $\text{CuPz-H}_2\text{O}\cdot\text{H}_2\text{O}$ .

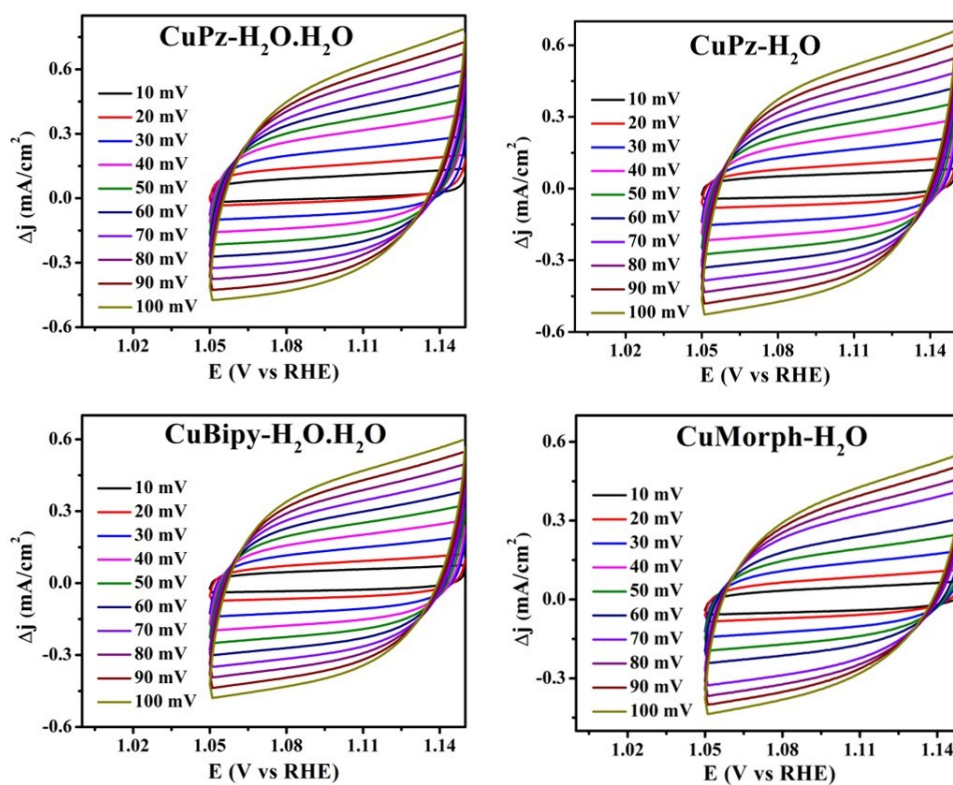

Figure S10. Double layer capacitance and capacitive currents as a functional of scan rate.
